# Supplementary material for: Identification and characterization of novel endolysins targeting Gardnerella vaginalis biofilms to treat bacterial vaginosis
Source: PubMed Central journal article supplement (PMC9018826; doi:10.1038/s41522-022-00285-0), 2022-04-19
Supplement: 41522_2022_285_MOESM1_ESM.pdf [file 41522_2022_285_MOESM1_ESM.pdf]

**Supplementary Materials: Identification and characterization of novel endolysins targeting *Gardnerella vaginalis* biofilms to treat bacterial vaginosis.**

Sara Arroyo-Moreno<sup>1,2</sup>, Matthew Cummings<sup>3</sup>, David B. Corcoran<sup>3</sup>, Ronan R McCarthy<sup>1\*</sup>

<sup>1</sup> Division of Biosciences, Department of Life Sciences, College of Health and Life Sciences, Brunel University London, Uxbridge, UB8 3PH, UK.

<sup>2</sup> Cork Institute of Technology, Cork, Cork, Ireland

<sup>3</sup> CC Biotech Ltd, London, United Kingdom

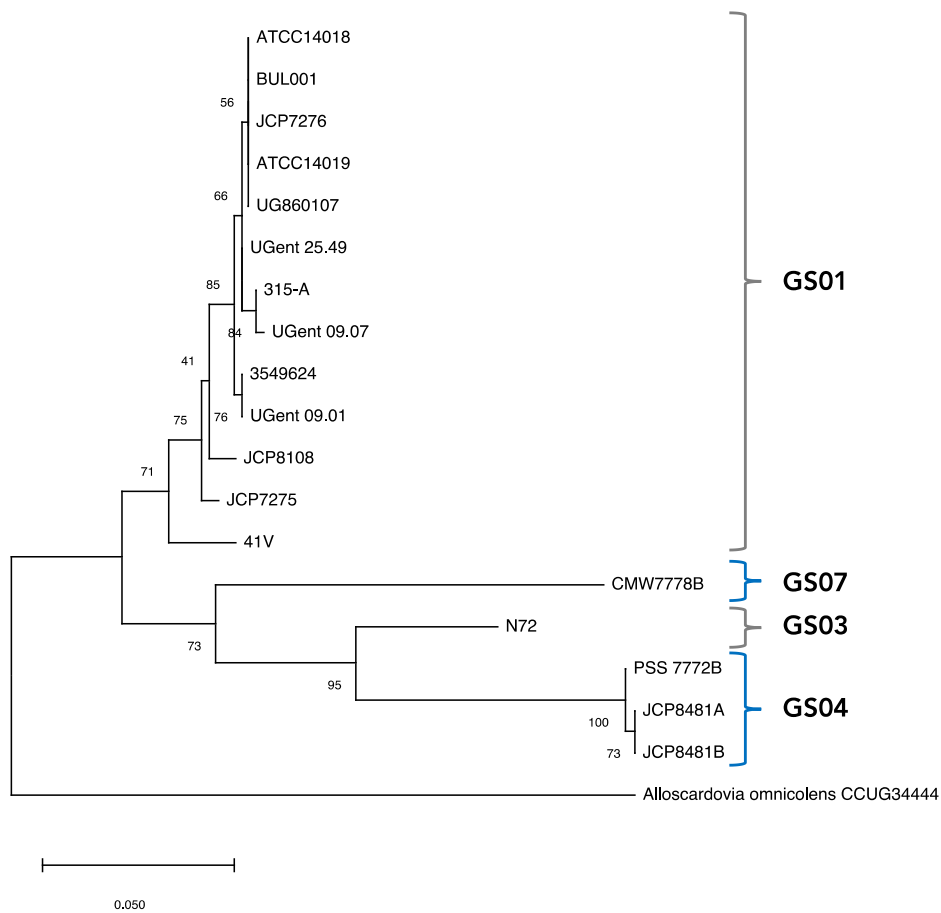

**Supplementary Figure 1:** Phylogenetic analysis of *Gardnerella vaginalis* Cpn60 chaperone DNA sequence. *G. vaginalis* UG860107 and BUL001 clade with clade C *Gardnerella* spp., or GS01 *Gardnerella* genomospecies as defined by Jayaprakash, Schellenberg and Hill (2012) and Potter *et. al.* (2019), respectively. Cpn60 sequences were retrieved from CpnDB (<https://www.cpndb.ca/>) on November 2021, or sequenced directly as previously described (3). Multiple sequence alignments and phylogenetic trees were constructed in Mega as described in Materials and Methods. Cpn60 gene sequences from *Alloscardovia omnicolens* CCUG34444 was used as an outgroup. GS: genomospecies.

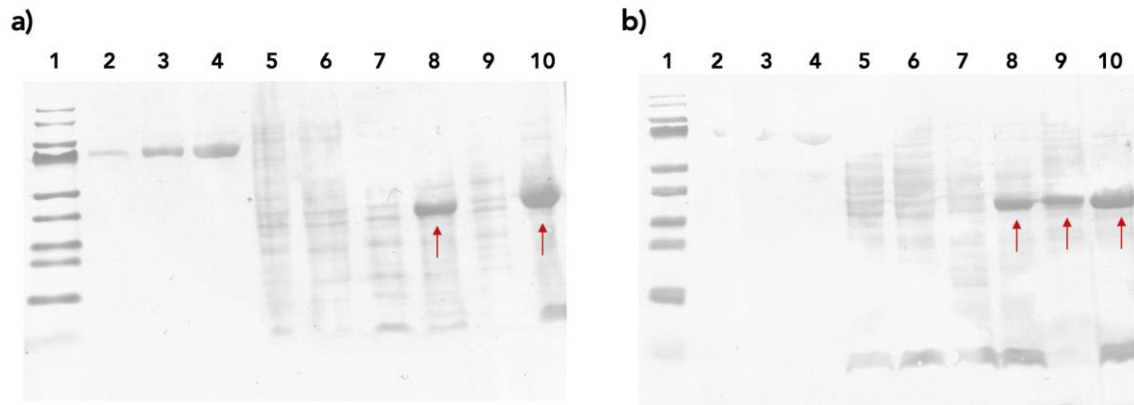

**Supplementary Figure 2: A)** Solubility of recombinant His<sup>6</sup>-CCB2M84\_97 in PBS pH 7.4 determined by Western Blot. Lane 1: molecular weight ladder. Protein standard sizes are shown in kDa. Lane 2: conalbumin (2 μg), Lane 3: conalbumin (5 μg), Lane 4: conalbumin (10 μg), Lane 5: host control - *E. coli* BL21(DE3) cell lysate, Lane 6: cell lysate from *E. coli* BL21(DE3) induced with IPTG, Lane 7: uninduced *E. coli* BL21(DE3) pCCB2M84\_97 cell lysate, Lane 8: *E. coli* BL21(DE3) pCCB2M84\_97 total cell lysate. Lane 9: *E. coli* BL21(DE3) pCCB2M84\_97 soluble protein fraction. Lane 10: *E. coli* BL21(DE3) pCCB2M84\_97 insoluble protein fraction. **B)** Solubility of recombinant His<sup>6</sup>-CCB2M87\_2 in PBS pH 7.4 determined by Western Blot. Lanes 1 through 6 are as described in A. Lane 7: uninduced *E. coli* BL21(DE3) pCCB2M87\_2 cell lysate, Lane 8: *E. coli* BL21(DE3) pCCB2M87\_2 total cell lysate. Lane 9: Soluble protein fraction. Lane 10: Insoluble protein fraction. The molecular weights of His<sup>6</sup>-CCB2M84\_97 and His<sup>6</sup>-CCB2M87\_2 are 35.94 and 35.95 kDa, respectively.

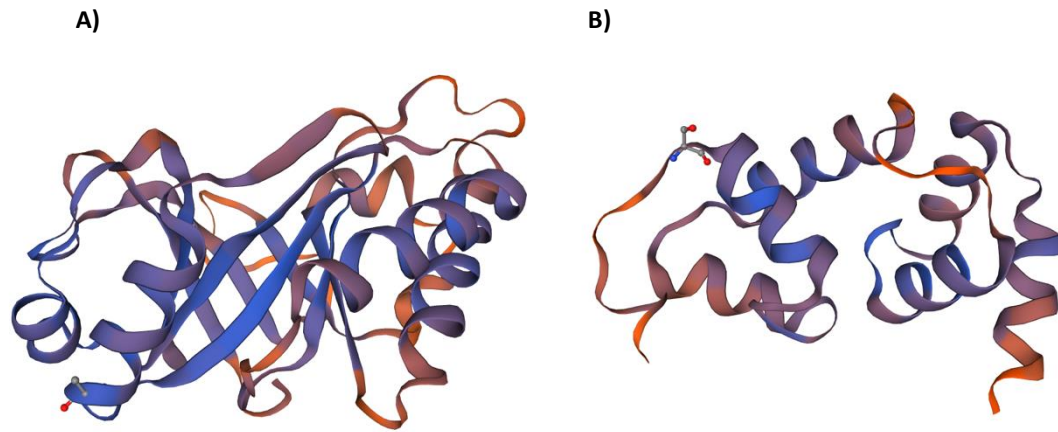

**Supplementary Figure 3:** **A)** CCB2M87\_2 enzymatic active domain homology model constructed using an endolysin from the *Clostridium perfringens* phage phiSM101 (PDB: 4krt.2) as a template. Ala53 is shown as grey sticks and balls. **B)** CCB2M87\_2 cell wall binding domain homology model constructed using PDB: 5i8l.1 as a template. Asparagine 233 is shown as grey sticks and balls.

A)

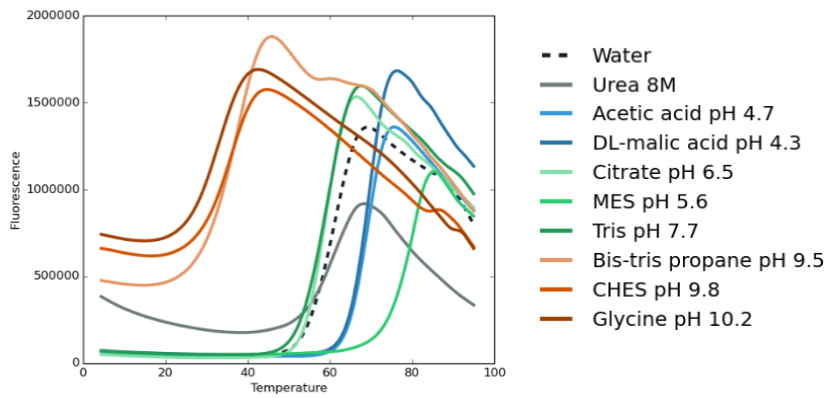

B)

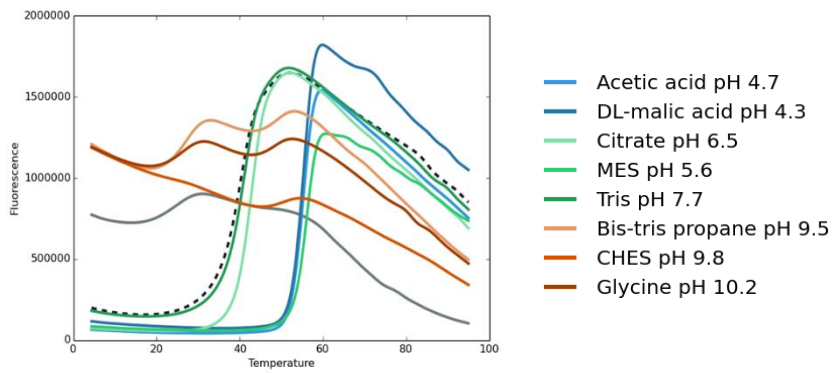

C)

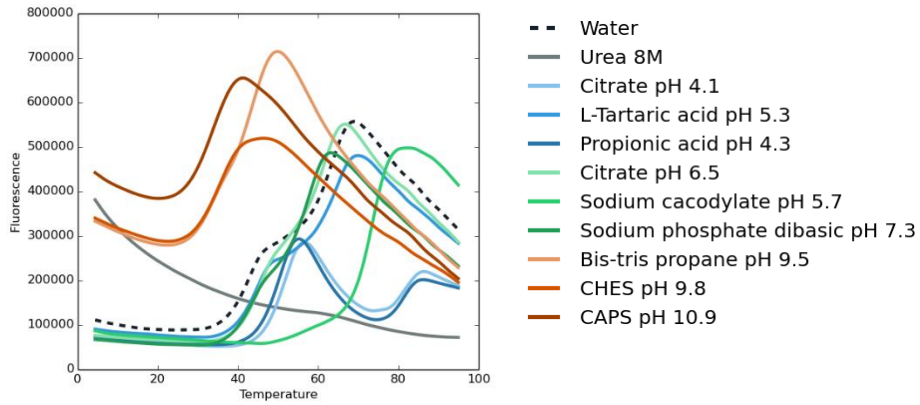

D)

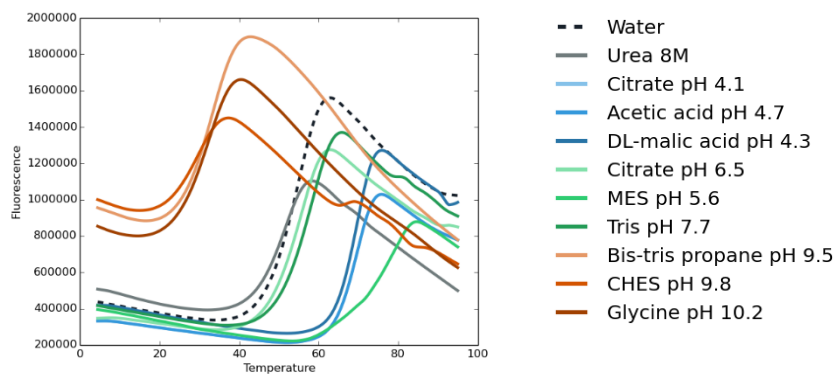

E)

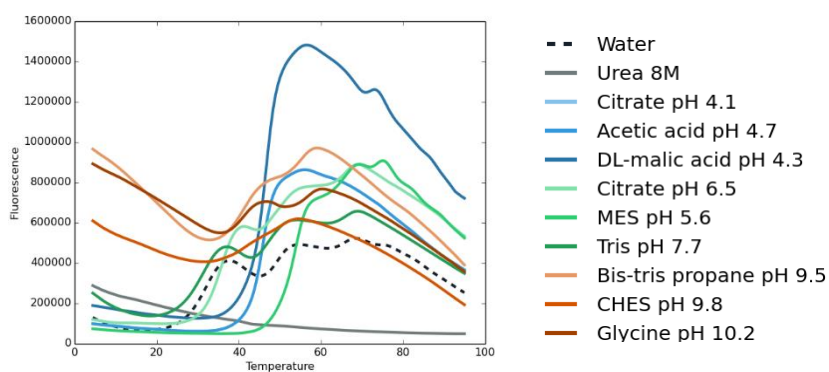

F)

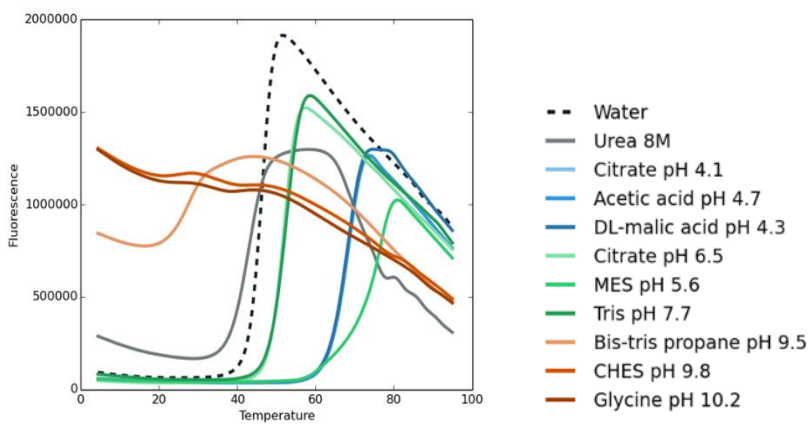

G)

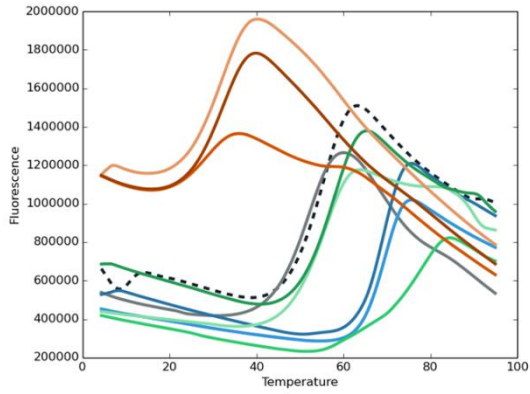

- Water
- Urea 8M
- Citrate pH 4.1
- Acetic acid pH 4.7
- DL-malic acid pH 4.3
- Citrate pH 6.5
- MES pH 5.6
- Tris pH 7.7
- Bis-tris propane pH 9.5
- CHES pH 9.8
- Glycine pH 10.2

H)

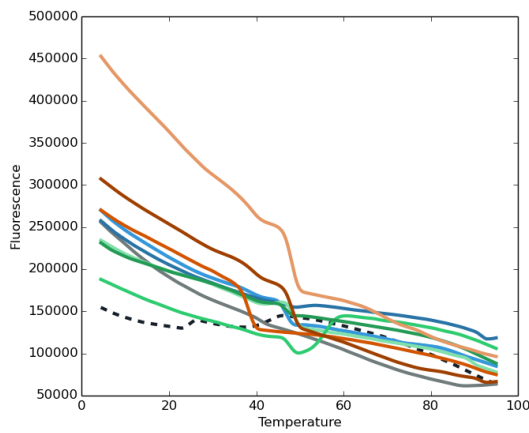

- Water
- Urea 8M
- Citrate pH 4.1
- Acetic acid pH 4.7
- DL-malic acid pH 4.3
- Citrate pH 6.5
- MES pH 5.6
- Tris pH 7.7
- Bis-tris propane pH 9.5
- CHES pH 9.8
- Glycine pH 10.2

I)

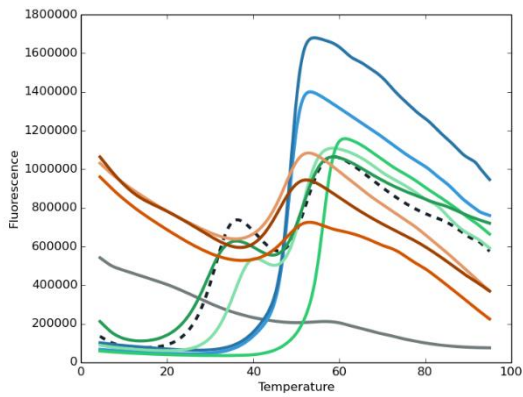

- Water
- Urea 8M
- Citrate pH 4.1
- Acetic acid pH 4.7
- DL-malic acid pH 4.3
- Citrate pH 6.5
- MES pH 5.6
- Tris pH 7.7
- Bis-tris propane pH 9.5
- CHES pH 9.8
- Glycine pH 10.2

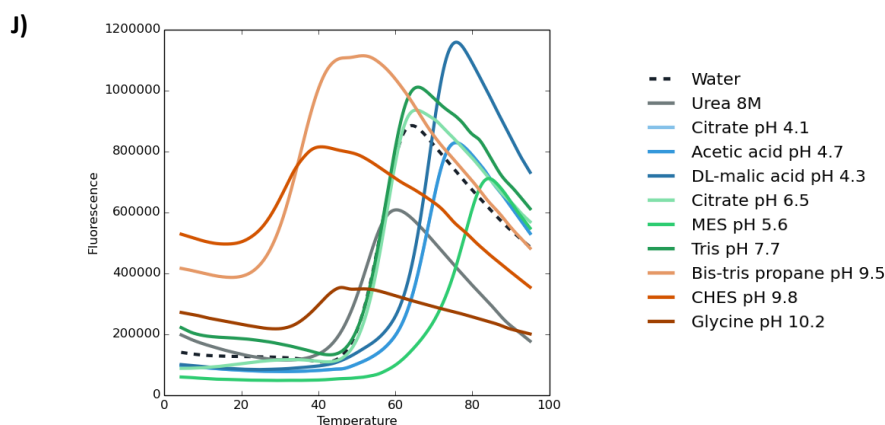

**Supplementary Figure 4 A)** Thermal shift analysis of CCB2M94\_8 in varying buffer systems. Melt temperatures are as follows: Water (T<sub>m</sub> 59.88°C), Urea 8 m (T<sub>m</sub> 59.21°C), Citrate pH 4.1 (T<sub>m</sub> 68.33°C), Acetic acid pH 4.7 (T<sub>m</sub> 68.42°C), DL-Malic acid pH 4.3 (T<sub>m</sub> 68.66), Citrate pH 6.5 (T<sub>m</sub> 58.33°C), MES pH 5.6 (T<sub>m</sub> 77.76 °C), Tris pH 7.7 (T<sub>m</sub> 58.26), Bis-tris propane pH 9.5 (T<sub>m</sub> 35.38°C), CHES pH 9.8 (T<sub>m</sub> 34.29), Glycine pH 10.2 (T<sub>m</sub> 31.81). **B)** Thermal shift analysis of CCB7.1 in varying buffer systems. Water (T<sub>m</sub> 39.42°C), Urea 8 M (23.61°C), Citrate pH 4.1 (T<sub>m</sub> 54.72°C), Acetic acid pH 4.7 (T<sub>m</sub> 54.59°C), DL-Malic acid pH 4.3 (T<sub>m</sub> 54.83°C), Citrate pH 6.5 (T<sub>m</sub> 42.45°C), MES pH 5.6 (T<sub>m</sub> 55.51°C), Tris pH 7.7 (T<sub>m</sub> 40.27°C), Bis-tris propane pH 9.5 (T<sub>m</sub> 26.34°C), CHES pH 9.8 (T<sub>m</sub> 50.16°C), Glycine pH 10.2 (T<sub>m</sub> 25.53°C) **C)** Thermal shift analysis of CCB8.1 in varying buffer systems. Melt temperatures are as follows: Water (T<sub>m</sub> 53.23°C), Urea 8 M (Not detected), Citrate pH 4.1 (T<sub>m</sub> 50.23°C), L-Tartaric acid pH 5.3 (T<sub>m</sub> 53.95°C), Propionic acid pH 4.3 (T<sub>m</sub> 48.9°C), Citrate pH 6.5 (T<sub>m</sub> 71.7°C), Sodium cacodylate pH 5.7 (T<sub>m</sub> 71.7°C), Sodium phosphate dibasic pH 7.3 (T<sub>m</sub> 51.13°C), Bis-tris propane pH 9.5 (T<sub>m</sub> 39.39°C), CHES pH 9.8 (T<sub>m</sub> 34.76°C), CAPS pH 10.9 (T<sub>m</sub> 32.75°C). Fluorescence is measure in arbitrary units (au). **D)** Thermal shift analysis of CCB2.2 in varying buffer systems. Water (T<sub>m</sub> 52.9°C), A4: Urea 8 m (T<sub>m</sub> 49.5°C), A4: Citrate pH 4.1 (T<sub>m</sub> 68.2°C), A8: Acetic acid pH 4.7 (T<sub>m</sub> 67.79°C), DL-Malic acid pH 4.3 (T<sub>m</sub> 68.36), C3: Citrate pH 6.5 (T<sub>m</sub> 53.3°C), MES pH 5.6 (T<sub>m</sub> 73.4 °C), G1: Tris pH 7.7 (T<sub>m</sub> 56.06), G12: Bis-tris propane pH 9.5 (T<sub>m</sub> 31.94°C), H6: CHES pH 9.8 (T<sub>m</sub> 28.22), H9 Glycine pH 10.2 (T<sub>m</sub> 30.56) **E)** Thermal shift analysis of CCB4.1 in varying buffer systems. Water (T<sub>m</sub> 30.53°C), Urea 8 M (not detected), Citrate pH 4.1 (T<sub>m</sub> 45.51°C), Acetic acid pH 4.7 (T<sub>m</sub> 46.52°C), DL-Malic acid pH 4.3 (T<sub>m</sub> 46.14°C), Citrate pH 6.5 (T<sub>m</sub> 41.48°C), MES pH 5.6 (T<sub>m</sub> 54.07°C), Tris pH 7.7 (T<sub>m</sub> 36.93°C), Bis-tris propane pH 9.5 (T<sub>m</sub> 44.97°C), CHES pH 9.8 (T<sub>m</sub> 44.12), Glycine pH 10.2 (T<sub>m</sub> 45.15). **F)** Thermal shift analysis of CCB2M90\_2 in varying buffer systems. Water (T<sub>m</sub> 45.8°C), Urea 8 m (T<sub>m</sub> 42.64°C), Citrate pH 4.1 (T<sub>m</sub> 67.21°C), Acetic acid pH 4.7 (T<sub>m</sub> 67.16°C), DL-Malic acid pH 4.3 (T<sub>m</sub> 67.29°C), C3: Citrate pH 6.5 (T<sub>m</sub> 51.27°C), MES pH 5.6 (T<sub>m</sub> 72.42 °C), Tris pH 7.7 (T<sub>m</sub> 51.8°C), Bis-tris propane pH 9.5 (T<sub>m</sub> 28.02°C), CHES pH 9.8 (T<sub>m</sub> 24.63°C), Glycine pH 10.2 (T<sub>m</sub> 41.17°C) **G)** Thermal shift analysis of CCB2.4 in varying buffer systems. Water (T<sub>m</sub> 53.78°C), Urea 8 M (T<sub>m</sub> 50.13°C), Citrate pH 4.1 (T<sub>m</sub> 68.37°C), Acetic acid pH 4.7 (T<sub>m</sub> 67.58°C), DL-Malic acid pH 4.3 (T<sub>m</sub> 68.1°C), Citrate pH 6.5 (T<sub>m</sub> 53.74°C), MES pH 5.6 (T<sub>m</sub> 72.7°C), Tris pH 7.7 (T<sub>m</sub> 56.06°C), Bis-tris propane pH 9.5 (T<sub>m</sub> 30.34°C), CHES pH 9.8 (T<sub>m</sub> 27.36), Glycine pH 10.2 (T<sub>m</sub> 30.64) **H)** Thermal shift analysis of CCB3.2 in varying buffer systems, analysis of starting material shows CCB3.2 to be denatured. **I)** Thermal shift analysis of CCB4.2 in varying buffer systems. Water (T<sub>m</sub> 52.29°C, second peak), Urea 8 M (52.69°C), Citrate pH 4.1 (T<sub>m</sub> 47.36°C), Acetic acid pH 4.7 (T<sub>m</sub> 48.82°C), DL-Malic acid pH 4.3 (T<sub>m</sub> 47.84°C), Citrate pH 6.5 (T<sub>m</sub> 44.24°C), MES pH 5.6 (T<sub>m</sub> 55.12°C), Tris pH 7.7 (T<sub>m</sub> 51.61°C), Bis-tris propane pH 9.5 (T<sub>m</sub> 46.04°C), CHES pH 9.8 (T<sub>m</sub> 46.58°C), Glycine pH 10.2 (T<sub>m</sub> 45.37°C). **J)** Thermal shift analysis of CCB230b in varying buffer systems. Water (T<sub>m</sub> 55.33°C), Urea 8 M (50.62°C), Citrate pH 4.1 (T<sub>m</sub> 66.2°C), Acetic acid pH 4.7 (T<sub>m</sub> 66.44°C), DL-Malic acid pH 4.3 (T<sub>m</sub> 66.28°C), Citrate pH 6.5 (T<sub>m</sub> 56.45°C), MES pH 5.6 (T<sub>m</sub> 73.54°C), Tris pH 7.7 (T<sub>m</sub> 56.42°C), Bis-tris propane pH 9.5 (T<sub>m</sub> 34.3°C), CHES pH 9.8 (T<sub>m</sub> 30.2°C), Glycine pH 10.2 (T<sub>m</sub> 38.83°C).



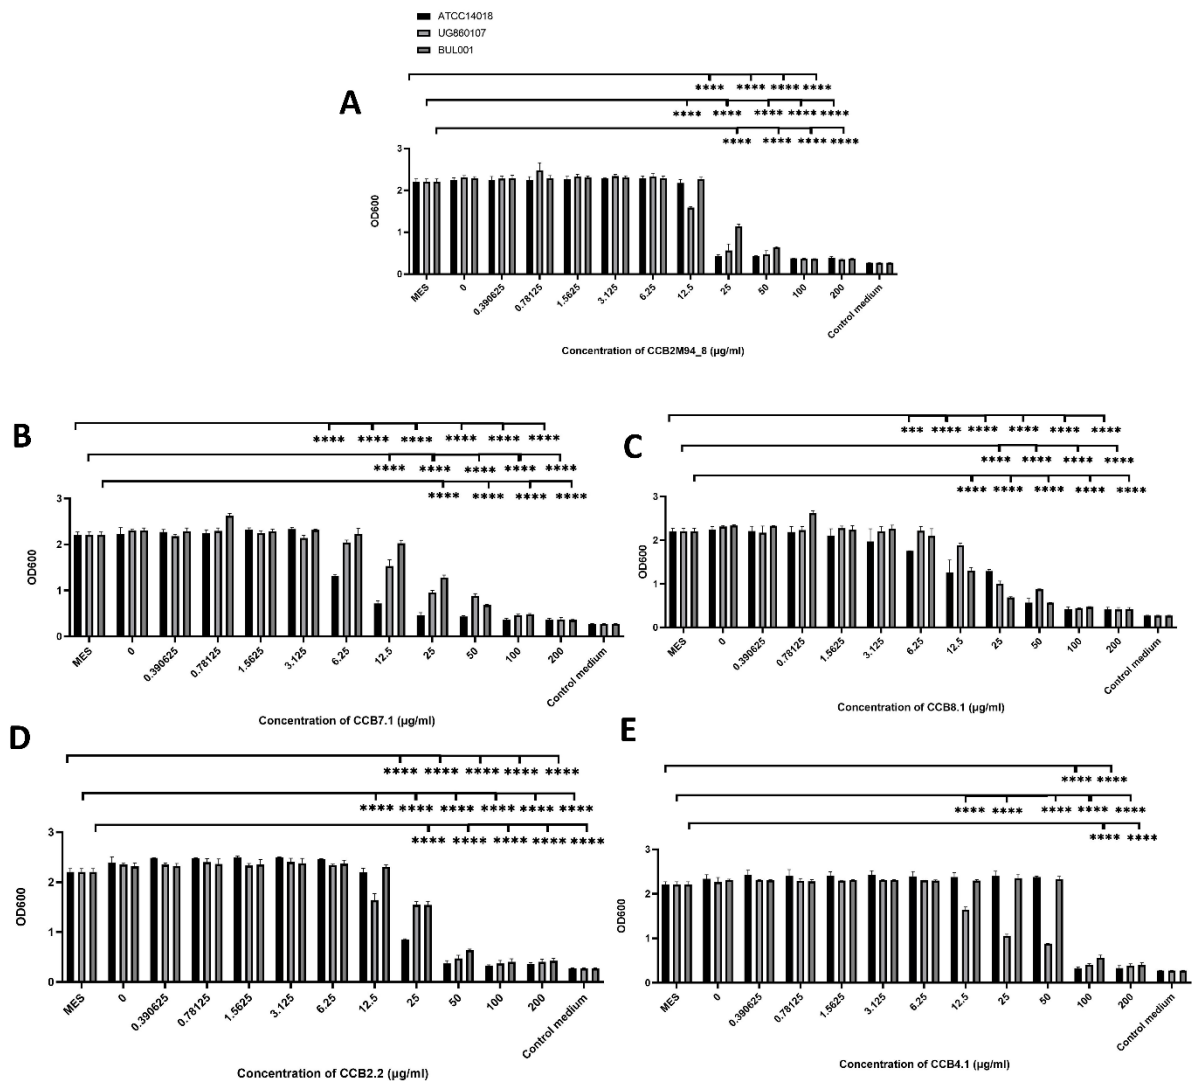

**Supplementary Figure 5. Endolysin Biofilm Prevention Activity:** Biofilm prevention assay using *G. vaginalis* ATCC14018, *G. vaginalis* UG860107 and *G. vaginalis* BUL001 cultures. Final concentrations of (A) CCB2M94\_8, (B) CCB7.1, (C) CCB8.1, (D) CCB2.2 or (E) CCB4.1, from 0.39 to 200 µg/µl were used to prevent biofilms. OD<sub>600</sub> readings are the average of biological triplicates. The asterisks in figures indicate levels of significance.  $p$ -values < 0.05 are represented by \*,  $p$ -values < 0.01 are represented by \*\*,  $p$ -values < 0.001 are represented by \*\*\* and  $p$ -values < 0.0001 are represented by \*\*\*\*. No statistical differences are represented by ns.

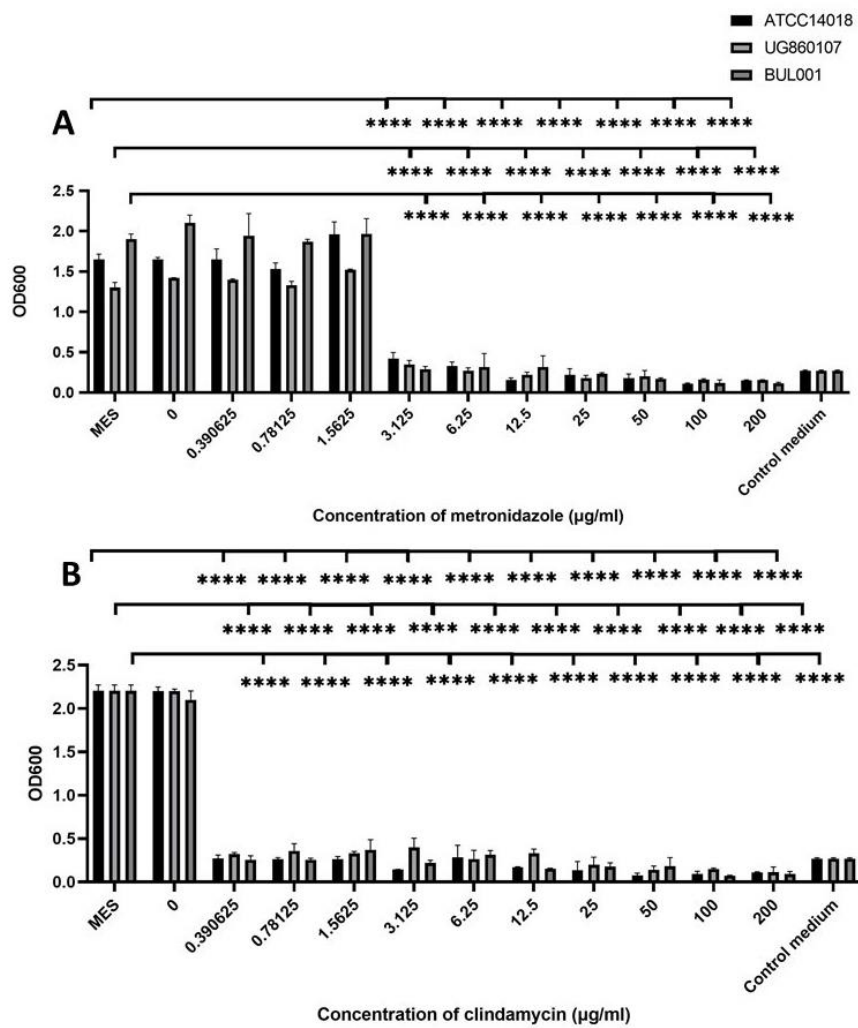

**Supplementary Figure 6. Antibiotic Biofilm Prevention Activity:** Biofilm prevention assays using *G. vaginalis* ATCC14018, *G. vaginalis* UG860107 and *G. vaginalis* BUL001 cultures. Final concentrations of (A) metronidazole or (B) clindamycin from 0.39 to 200  $\mu\text{g}/\mu\text{l}$ , were used to disrupt biofilms. OD600 readings are the average of biological triplicates. The asterisks in figures indicate levels of significance. p-values < 0.05 are represented by \*, p-values < 0.01 are represented by \*\*, p-values < 0.001 are represented by \*\*\* and p-values < 0.0001 are represented by \*\*\*\*. No statistical differences are represented by ns.

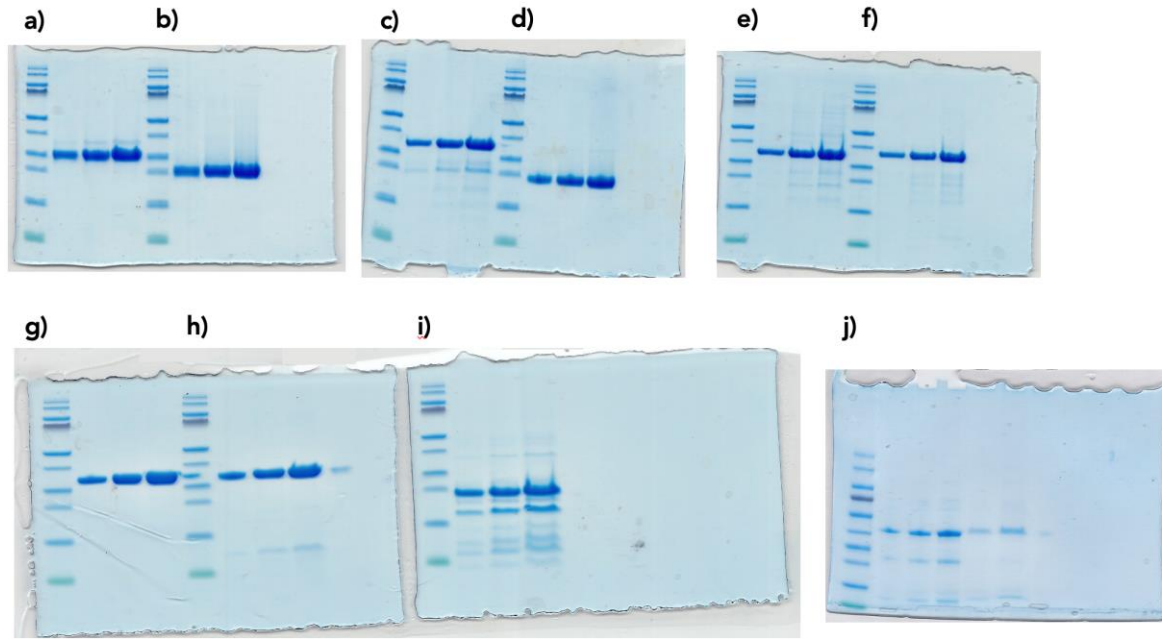

**Supplementary Figure 7:** Purified recombinant endolysin proteins: **A)** CCB2.2 (30 kDa) **B)** CCB2.4 (25 kDa) **C)** CCB8.1 (36 kDa) **D)** CCB4.2 (25 kDa) **E)** CCB7.1 (36 kDa) **F)** CCB4.1 (38 kDa) **G)** CCB2M90\_2 (36 kDa) **H)** CCB2M94\_8 (36 kDa) **I)** CCB3.2 **J)** CCB230b (40 kDa) Molecular weight ladder values from top to bottom are as follows: 170, 130, 95, 72, 55, 43, 34, 26, 17, 10 kDa. Each purified endolysin candidates was visualised at increasing concentrations (2, 5 and 10 µg).

**Supplementary Table 1:** Distribution of CCB family endolysin gene sequences across *Gardnerella* genomospecies. Genomospecies are as outlined by Potter, Burnham and Dantas (2019).

|      | CCB2 | CCB3 | CCB4 | CCB6 | CCB7 | CCB8 | CCB9 |
|------|------|------|------|------|------|------|------|
| N/A  |      |      |      |      |      |      |      |
| GS01 |      |      |      |      |      |      |      |
| GS02 |      |      |      |      |      |      |      |
| GS03 |      |      |      |      |      |      |      |
| GS04 |      |      |      |      |      |      |      |
| GS05 |      |      |      |      |      |      |      |
| GS06 |      |      |      |      |      |      |      |
| GS07 |      |      |      |      |      |      |      |
| GS08 |      |      |      |      |      |      |      |
| GS09 |      |      |      |      |      |      |      |

**Supplementary Table 2.** Protein accession numbers for parent sequence of each fully characterised endolysin candidate. Accession numbers/source material for homologues are not detailed.

| <b>Candidate Name</b> | <b>Accession</b>               | <b>Source Material</b>         | <b>Genomospecies*</b> |
|-----------------------|--------------------------------|--------------------------------|-----------------------|
| CCB2M94_8             | Derived from<br>WP_116712567.1 | <i>G. vaginalis</i> NR010      | GS09                  |
| CCB2.2                | Derived from<br>WP_116691955.1 | <i>G. vaginalis</i> N165       | GS01                  |
| CCB4.1                | Derived from<br>WP_075038579.1 | <i>G. vaginalis</i> ATCC 49145 | GS01                  |
| CCB7.1                | Derived from<br>WP_102168908.1 | <i>G. vaginalis</i> UMB0388    | N/A                   |
| CCB8.1                | Derived from PMC27097.1        | <i>G. vaginalis</i> UMB0388    | N/A                   |

\*Genomospecies are as outlined by Potter, Burnham and Dantas (2019). N/A is stated where organisms fall outside of this taxonomic classification. Notable examples include a CCB4 family endolysin identified in *Gardnerella vaginalis* FDAARGOS\_568, and CCB8 and CCB7 candidates which were isolated from *Gardnerella vaginalis* UMB0388. GenBank nucleotide entries for the latter strain indicate this organism to be a *Gardnerella vaginalis* isolate (accession: PNGN00000000.1), however the exact provenance of this DNA has recently been questioned (4, 5).

## References:

1. Jayaprakash, T. P., Schellenberg, J. J. and Hill, J. E., Resolution and Characterization of Distinct cpn60-Based Subgroups of *Gardnerella vaginalis* in the Vaginal Microbiota *PLoS one* **7** e43009 (2012) DOI: 10.1371/journal.pone.0043009.
2. Potter, R.F., Burnham, C., Dantas, G., In Silico Analysis of *Gardnerella* Genomespecies Detected in the Setting of Bacterial Vaginosis. *Clin. Chem.* **65** 1375-1387 (2019) DOI: 10.1373/clinchem.2019.305474
3. Hill, J. E., Town, J. R., Hemmingsen, S. M., Improved template representation in cpn60 polymerase chain reaction (PCR) product libraries generated from complex templates by application of a specific mixture of PCR primers. *Environ. Microbiol.* **8** 741-746 (2006) DOI: 10.1111/j.1462-2920.2005.00944.x
4. Tortelli, B. A., Lewis, A. L., Fay, J. C. The structure and diversity of strain level variation in vaginal bacteria. *Microb. Genom.* **7** mgen000543 (2021) DOI: 10.1099/mgen.0.000543
5. Tarracchini, C., Lugli, G. A., Mancabelli, L., Milani, C., Turrone, F., Ventura., M. Assessing the Genomic Variability of *Gardnerella vaginalis* through Comparative Genomic Analyses: Evolutionary and Ecological Implications. *Appl. Environ. Microbiol.* **87** e02188-20 (2020) DOI: 10.1128/AEM.02188-20
